# Supplementary material for: Sexual assault and fatal violence against women during the Irish War of Independence, 1919–1921: Kate Maher’s murder in context
Source: HighWire-hosted journal article supplement (doi:10.1136/medhum-2021-012178), 2021-11-05
Supplement: medhum-2021-012178supp001_data_supplement.pdf [file medhum-2021-012178supp001_data_supplement.pdf]

**Archival appendix.**

General Register Office Records

[https://civilrecords.irishgenealogy.ie/churchrecords/images/deaths\\_returns/deaths\\_1921/05103/4402237.pdf](https://civilrecords.irishgenealogy.ie/churchrecords/images/deaths_returns/deaths_1921/05103/4402237.pdf) accessed 10 December 2020. Death registration Kate Maher.

[https://civilrecords.irishgenealogy.ie/churchrecords/images/deaths\\_returns/deaths\\_1921/05105/4402910.pdf](https://civilrecords.irishgenealogy.ie/churchrecords/images/deaths_returns/deaths_1921/05105/4402910.pdf)

Accessed 8 December 2020. Death registration Sarah Fitzpatrick.

[https://civilrecords.irishgenealogy.ie/churchrecords/images/deaths\\_returns/deaths\\_1920/05112/4405503.pdf](https://civilrecords.irishgenealogy.ie/churchrecords/images/deaths_returns/deaths_1920/05112/4405503.pdf)

Accessed 8 December 2020. Death registration Elizabeth Carberry.

[https://civilrecords.irishgenealogy.ie/churchrecords/images/birth\\_returns/births\\_1910/01569/1633076.pdf](https://civilrecords.irishgenealogy.ie/churchrecords/images/birth_returns/births_1910/01569/1633076.pdf) Birth registration of Johanna Maher 2 April 1910.

Matthew Ryan Dundrum, Residents of a house 10 in Dundrum (Kilpatrick, Tipperary)

<http://www.census.nationalarchives.ie/reels/nai003294763/>
